# Supplementary material for: Nonoxidative coupling of ethane with gold loaded photocatalysts
Source: Royal Society of Chemistry journal article supplement (doi:10.1039/d1cy02193a), 2022-01-01
Supplement: d1cy02193a1.pdf [file d1cy02193a1.pdf]

Supplementary Information

## **Nonoxidative coupling of ethane with gold loaded photocatalysts**

Surya Pratap Singh,<sup>a</sup> Akira Yamamoto,<sup>a,b</sup> and Hisao Yoshida<sup>a,b,\*</sup>

<sup>a</sup> Graduate School of Human and Environmental Studies, Kyoto University,  
Kyoto 606-8501, Japan.

<sup>b</sup> Elements Strategy Initiative for Catalysts and Batteries (ESICB), Kyoto  
University, Kyoto 615-8245, Japan

\* Corresponding author: [yoshida.hisao.2a@kyoto-u.ac.jp](mailto:yoshida.hisao.2a@kyoto-u.ac.jp)

# 1 Experimental

## 1.1 Experimental set-up

The schematic experimental set-up used in the reaction test of photocatalytic direct ethane conversion is shown in Figure S1. A flow reactor similar to our previous works<sup>1,2</sup> was used in this study.

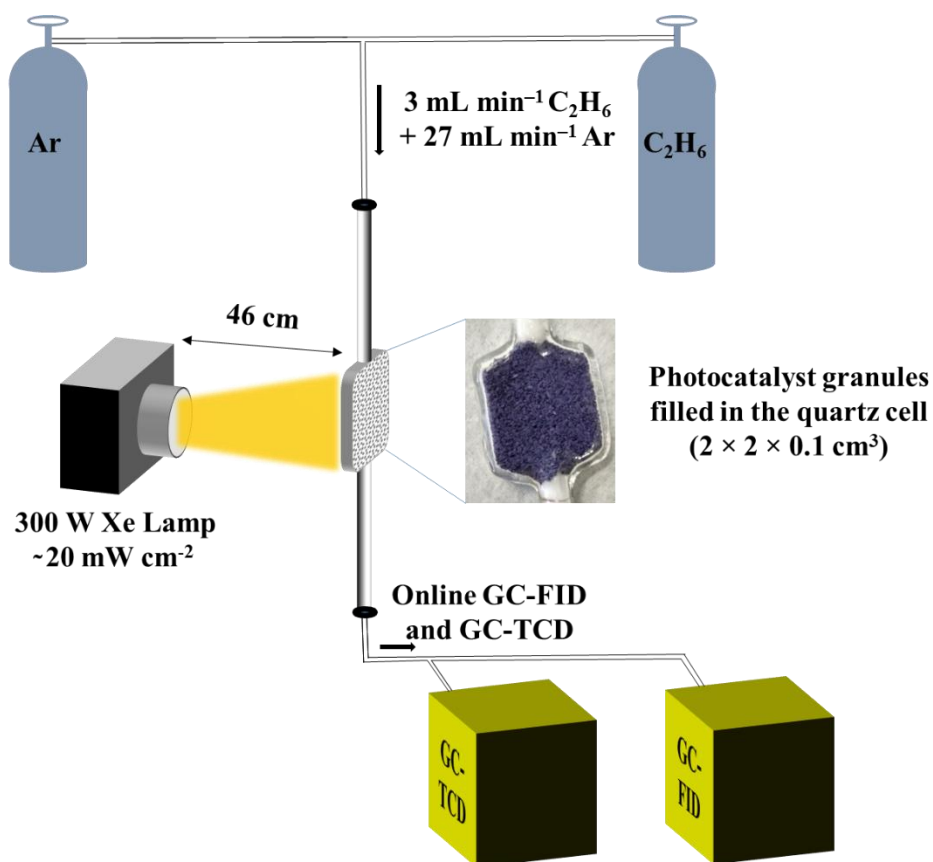

**Figure S1** The schematic diagram of the experimental set-up used in the reaction test of photocatalytic ethane conversion, which is similar to our previous work. Inset: the photograph of the quartz sample cell filled with the granules of the Au(0.4)/TiO<sub>2</sub> sample. The size of the sample cell was 2 × 2 × 0.1 cm<sup>3</sup>.

## 1.2 Spectral output of the xenon lamp

The spectral output of the Xe-lamp is shown in Figure S2. The lamp emits continuous light in the wavelength range of 200–800 nm with varying photon output in agreement with the uncorrected Xe-lamp spectrum reported in literature.<sup>3,4</sup>

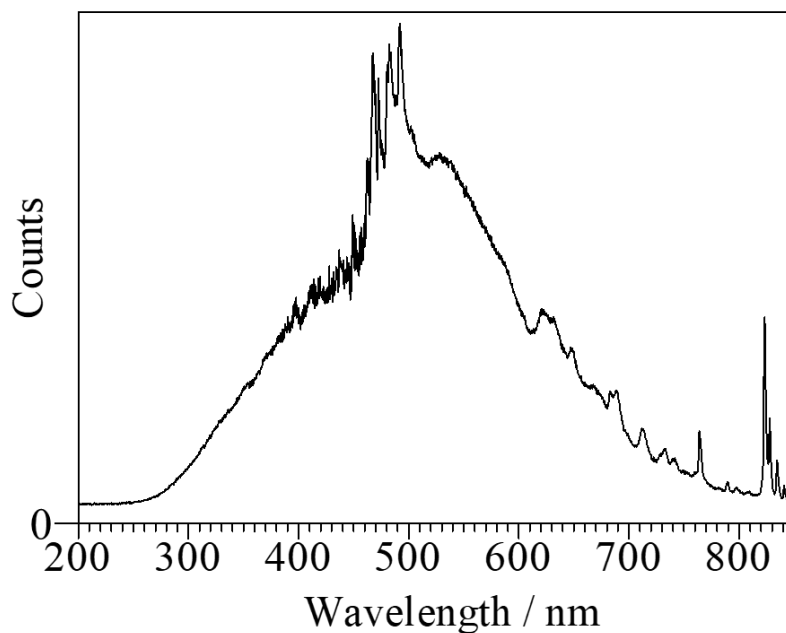

**Figure S2** Spectral output of the Xe-lamp.

## 1.3 Calculations

### 1.3.1 Yield

The yield of hydrocarbons in the reaction is calculated based on the eq. 1, 2 and 5 in the main text as shown in eq. S1.

$$Yield (\%) = \frac{\text{Consumption rate of ethane } (2 \times R_{C_4H_{10}} + R_{C_2H_4} + R_{CH_4})}{\text{Introduction rate of ethane}} \times 100 \quad (S1)$$

### 1.3.2 Selectivity

The product selectivity based on ethane toward *n*-butane and ethene are calculated as shown in eq. S2 and S3, respectively.

$$S_{C_4H_{10}} (\%) = \frac{2 \times R_{C_4H_{10}}}{2 \times R_{C_4H_{10}} + R_{C_2H_4} + R_{CH_4}} \times 100 \quad (S2)$$

$$S_{C_2H_4} (\%) = \frac{R_{C_2H_4}}{2 \times R_{C_4H_{10}} + R_{C_2H_4} + R_{CH_4}} \times 100 \quad (S3)$$

### 1.3.3 R value

The ratio of the obtained hydrocarbons and hydrogen,  $R_{HC/H_2}$  is defined as follows (eq. S4).

$$R_{HC/H_2} = \frac{R_{C_4H_{10}} + R_{C_2H_4} - R_{CH_4}}{R_{H_2}} \quad (S4)$$

where  $R_{C_4H_{10}}$ ,  $R_{C_2H_4}$ ,  $R_{CH_4}$ , and  $R_{H_2}$  are the production rates of *n*-butane, ethene, methane, and hydrogen, respectively.

### 1.3.4 Apparent quantum efficiency (AQE)

The apparent quantum efficiency (AQE) was calculated by the following equation as the ratio of the number of consumed holes for the *n*-butane formation (or ethene formation) and the number of incident photons.<sup>5</sup>

$$AQE (\%) = \frac{r \times n \times N}{(I \times A) / (hc/\lambda)} \times 100 \quad (S5)$$

where  $r$  = production rate of  $C_4H_{10}$  (or  $C_2H_4$ ) (in  $\text{mol s}^{-1}$ ),  $n$  = number of holes consumed for the production of  $C_4H_{10}$  (or  $C_2H_4$ ) ( $n=2$ ),  $N$  = Avogadro constant (in  $\text{mol}^{-1}$ ),  $I$  = intensity of the incident light estimated in the wavelength range of 200–420 nm (from the measured value in the wavelength range of 220–300 nm by a UV radiometer and the DR UV-vis absorption spectrum)

(in  $W\ cm^{-2}$ ),  $A$  = Area of the reactor (in  $cm^2$ ),  $h$  = Planck's constant (in  $J\ s$ ),  $c$  = speed of light (in  $m\ s^{-1}$ ),  $\lambda$  = wavelength of incident light (in  $m$ ).

## 2 Results and discussion

### 2.1 GC-TCD and GC-FID chromatograms

The chromatograms of the GC-TCD and the GC-FID after 1.5 h of the photocatalytic reaction test over the Au(0.4)/TiO<sub>2</sub> sample are shown in Figure S3 and Figure S4, respectively.

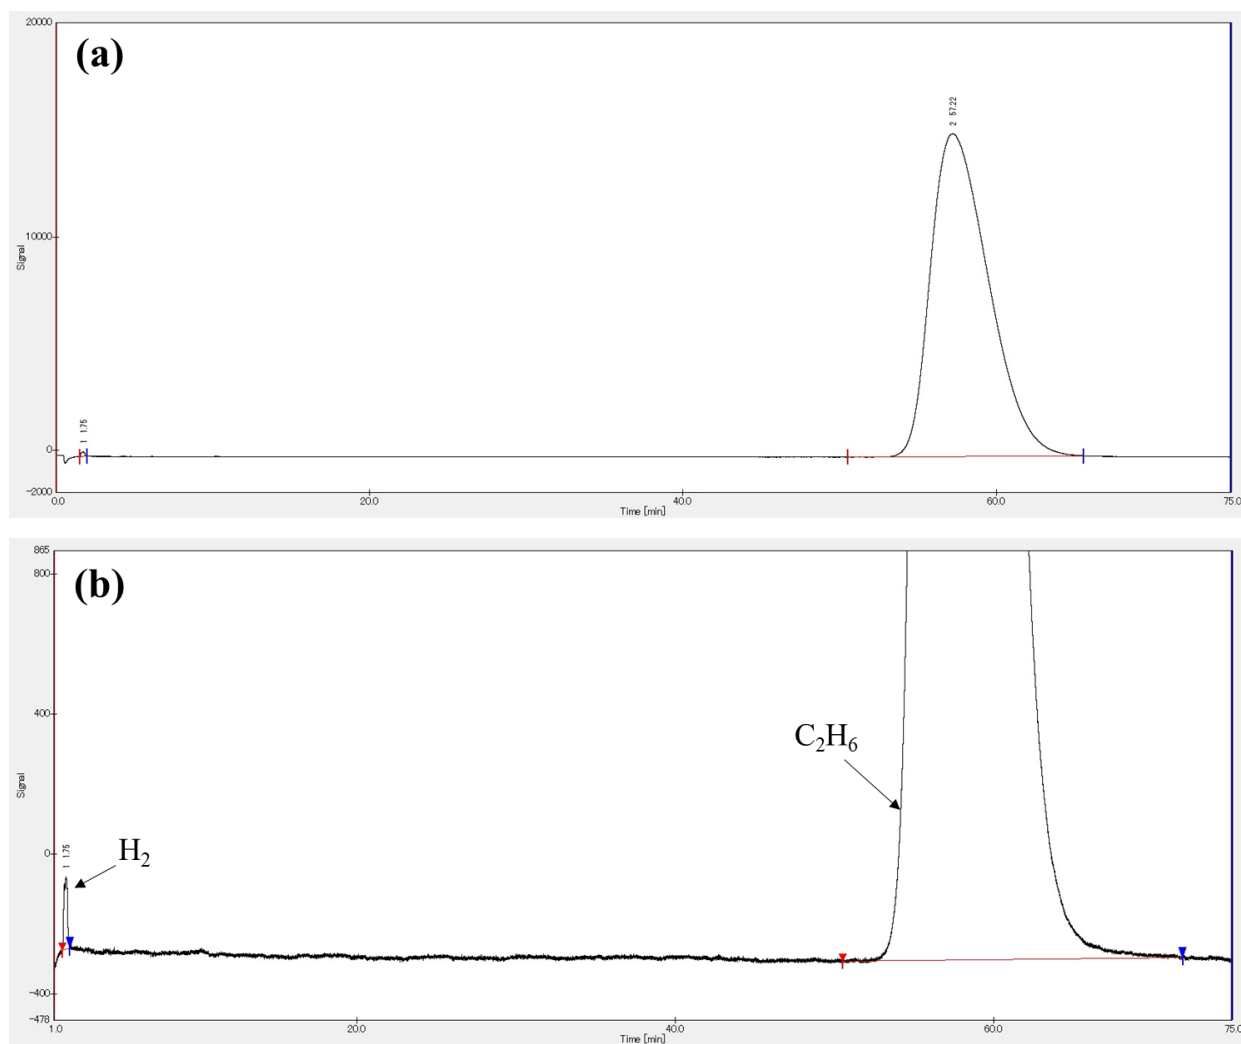

**Figure S3** GC-TCD chromatograms, (a) original and (b) magnified, after 1.5 h of the reaction test of photocatalytic direct ethane conversion over the Au(0.4)/TiO<sub>2</sub> sample. GC-TCD was used to analyze mainly hydrogen. The peaks of hydrogen (retention time = 1.7 min) and ethane (57 min) can be seen distinctly and were well separated.

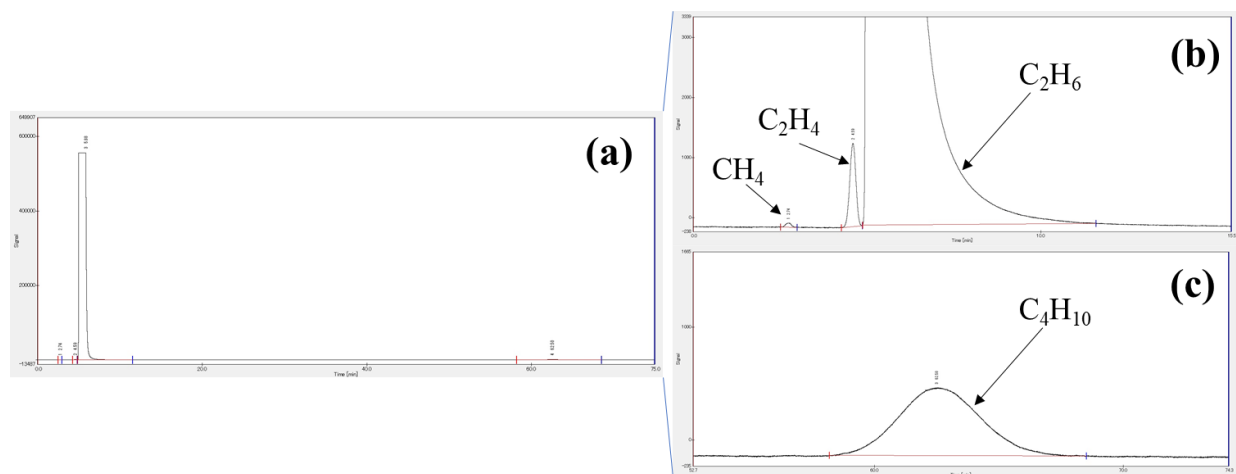

**Figure S4** GC-FID chromatogram, (a) original and (b-c) magnified, after 1.5 h of the reaction test of photocatalytic direct ethane conversion over the Au(0.4)/TiO<sub>2</sub> sample. The GC-FID was used to analyze mainly the hydrocarbons. The peaks of methane (2.8 min), ethene (4.6 min), ethane (5.9 min), and *n*-butane (62 min) can be seen distinctly and were well separated. No *i*-butane (48 min) was detected.

## 2.2 DR UV-vis spectrum of Al<sub>2</sub>O<sub>3</sub>

The DR UV-vis spectrum of the bare Al<sub>2</sub>O<sub>3</sub> sample is shown in Figure S5. A small absorption was observed in the wavelength range of 200–350 nm.

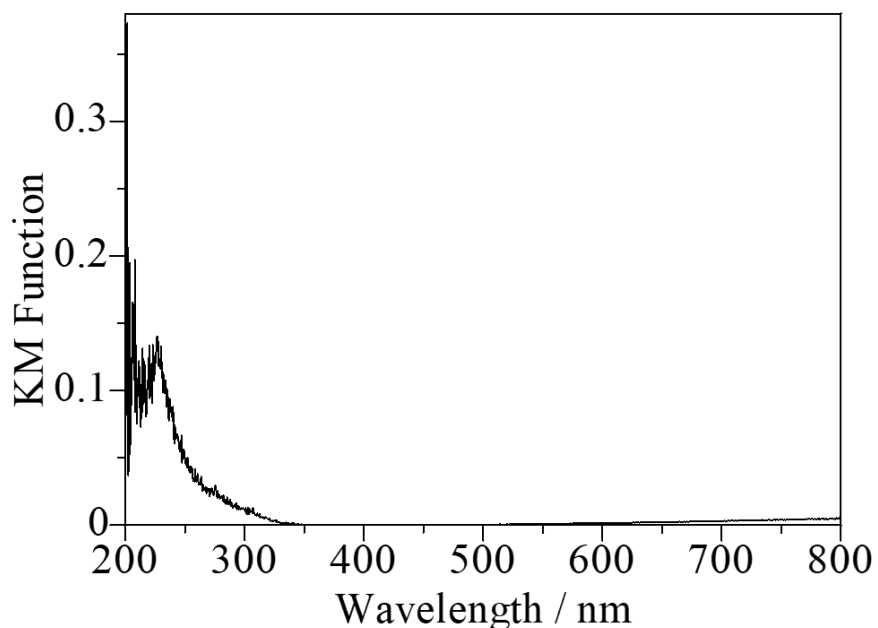

**Figure S5** DR UV-vis spectra of the bare Al<sub>2</sub>O<sub>3</sub> sample.

## 2.3 Estimation of loading amount of Au in the Au(x)/TiO<sub>2</sub> samples

The actual loading amounts of Au determined by the XRF analysis in various Au(x)/TiO<sub>2</sub> samples are given in Table S1.

**Table S1** Loading amount of Au in Au(x)/TiO<sub>2</sub> samples

| S. No. | Sample <sup>a</sup>      | Loading amount of Au (mol %) <sup>b</sup> |
|--------|--------------------------|-------------------------------------------|
| 1      | Au(0.1)/TiO <sub>2</sub> | 0.08                                      |
| 2      | Au(0.2)/TiO <sub>2</sub> | 0.18                                      |
| 3      | Au(0.4)/TiO <sub>2</sub> | 0.42                                      |
| 4      | Au(1.0)/TiO <sub>2</sub> | 1.04                                      |

<sup>a</sup>The samples were prepared by the photodeposition method. <sup>b</sup>Determined by XRF.

## 2.4 XRD patterns of Au/TiO<sub>2</sub> samples

XRD patterns of the TiO<sub>2</sub> and various Au/TiO<sub>2</sub> samples are shown in Figure S6. The lines derived from Au nanoparticles were evident for the Au(1.0)/TiO<sub>2</sub> sample.

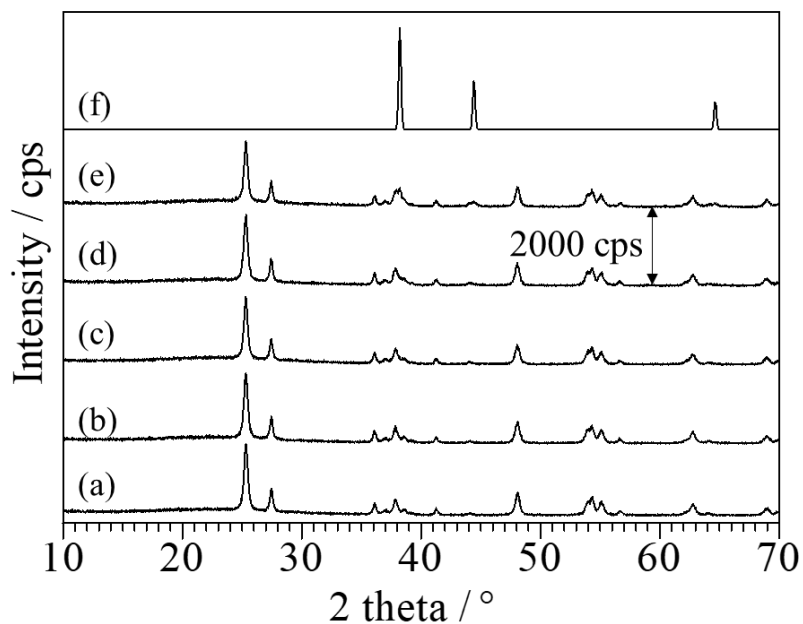

**Figure S6** XRD patterns of the samples, (a) TiO<sub>2</sub>, (b) Au(0.1)/TiO<sub>2</sub>, (c) Au(0.2)/TiO<sub>2</sub>, (d) Au(0.4)/TiO<sub>2</sub>, (e) Au(1.0)/TiO<sub>2</sub>, and (f) Au from the database (ICSD#52249).



## 2.5 SEM images and EDX elemental mappings

Figure S7 shows SEM images and elemental mappings. In the  $\text{TiO}_2$  sample, no regular shape of  $\text{TiO}_2$  particles could be seen and the agglomeration of nanoparticles was observed (Figure S7a). In the  $\text{Au}(0.4)/\text{TiO}_2$  sample, the morphology did not change much and the Au nanoparticles were dispersed on the  $\text{TiO}_2$  surface (Figure S7 b-e).

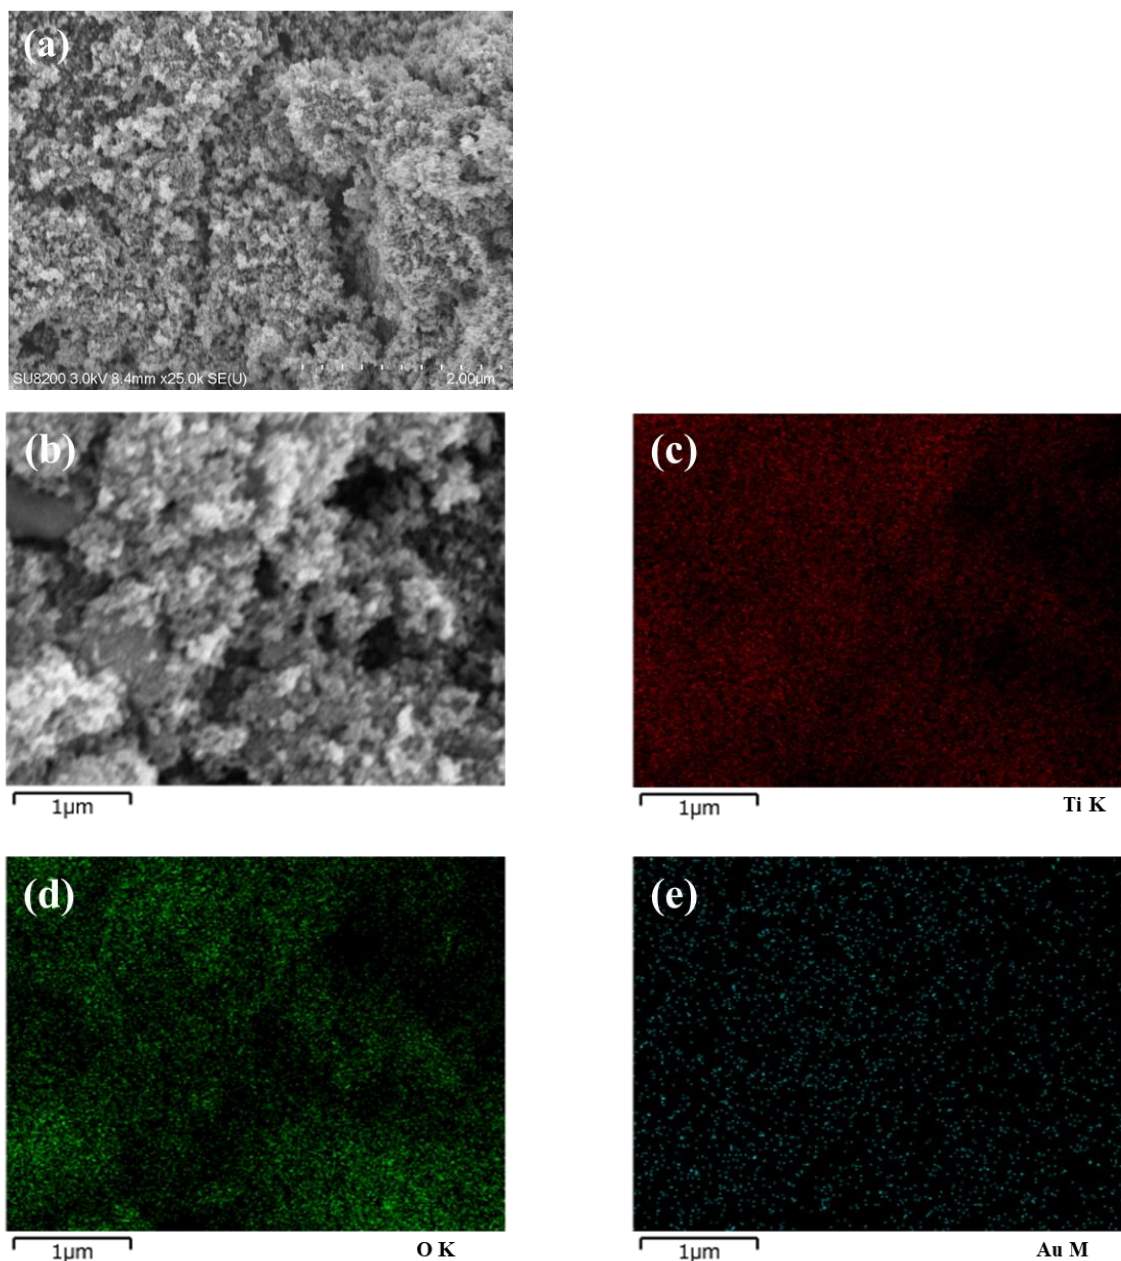

**Figure S7** (a) SEM image of the bare  $\text{TiO}_2$  sample, and (b) the SEM image and (c-e) elemental mappings of the  $\text{Au}(0.4)/\text{TiO}_2$  sample.

## 2.6 STEM images and particle size distribution of Au nanoparticles in the Au/TiO<sub>2</sub> samples

The STEM images and the particle size distribution of Au nanoparticles in the Au(0.1)/TiO<sub>2</sub>, Au(0.2)/TiO<sub>2</sub>, and Au(1.0)/TiO<sub>2</sub> samples are shown in Figure S8. With an increase in the loading amount of Au, the particle size of Au nanoparticles is increased in the Au/TiO<sub>2</sub> samples.

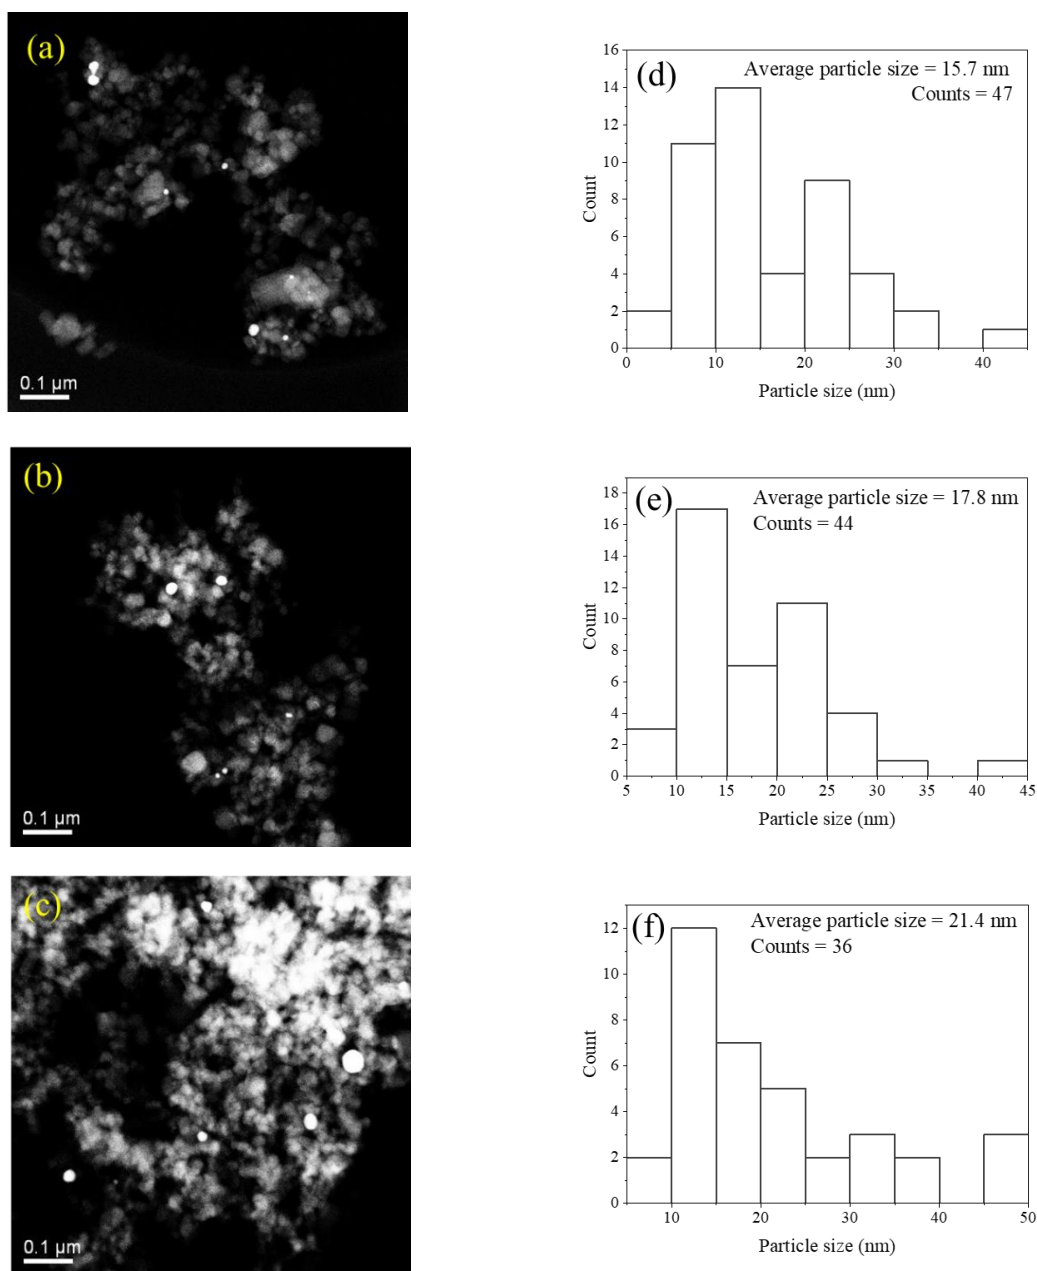

**Figure S8** STEM images (a–c) and particle size distribution of Au nanoparticles (d–f) in the Au(0.1)/TiO<sub>2</sub>, Au(0.2)/TiO<sub>2</sub>, and Au(1.0)/TiO<sub>2</sub> samples.

## 2.7 DR UV-vis spectra of Au/TiO<sub>2</sub> samples

The DR UV-vis spectra of various Au/TiO<sub>2</sub> samples are shown in Figure S9. An additional broad band centered at 550 nm due to the LSPR of Au nanoparticles was observed in the DR UV-vis spectra of the Au/TiO<sub>2</sub> samples. The intensity of this band increased with an increase in the loading amount of Au, where a slight red shift was observed.

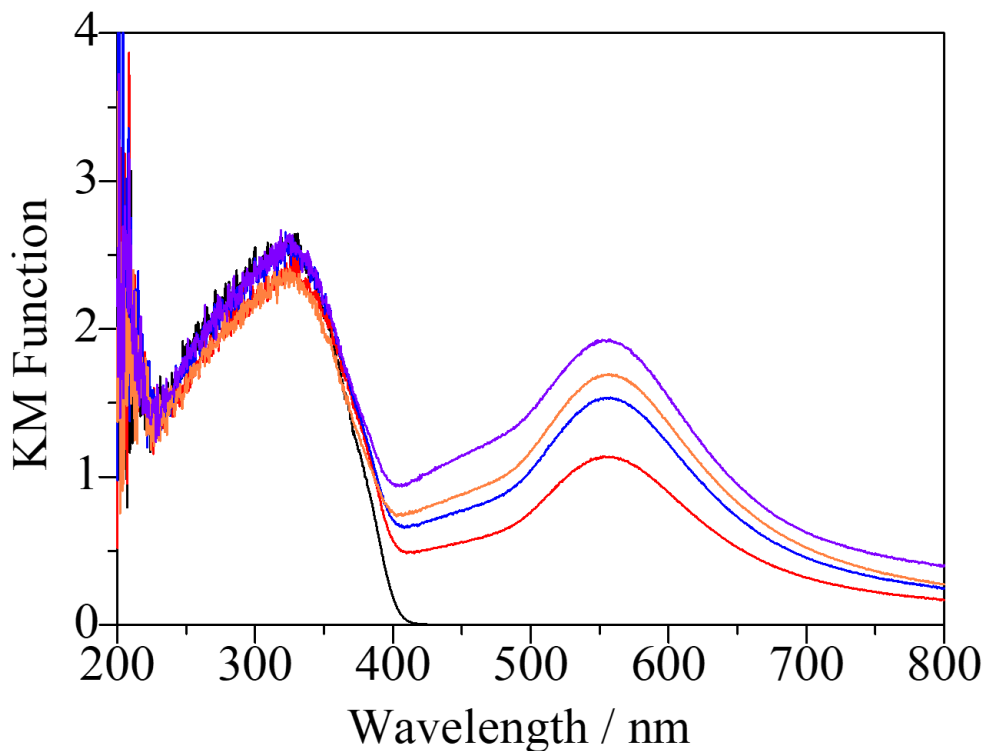

**Figure S9** DR UV-vis spectra of the samples; TiO<sub>2</sub> (black line), Au(0.1)/TiO<sub>2</sub> (red line), Au(0.2)/TiO<sub>2</sub> (blue line), Au(0.4)/TiO<sub>2</sub> (orange line), and Au(1.0)/TiO<sub>2</sub> (violet line).

## 2.8 Effect of thermal energy in the dark

Catalytic reaction tests in dark at various temperatures were carried out with the Au(0.4)/TiO<sub>2</sub> and Au(0.4)/Ga<sub>2</sub>O<sub>3</sub> samples and the results are given in Table S2 and Table S3, respectively.

**Table S2** Effect of increasing the temperature in dark with the Au(0.4)/TiO<sub>2</sub> sample<sup>a</sup>

| Entry | Temperature<br>(K) | Production rates <sup>b</sup> / $\mu\text{mol h}^{-1}$ |                               |                 |                               |                 |
|-------|--------------------|--------------------------------------------------------|-------------------------------|-----------------|-------------------------------|-----------------|
|       |                    | C <sub>4</sub> H <sub>10</sub>                         | C <sub>2</sub> H <sub>4</sub> | CH <sub>4</sub> | C <sub>3</sub> H <sub>6</sub> | H <sub>2</sub>  |
| 1     | 323                | nd <sup>c</sup>                                        | nd <sup>c</sup>               | nd <sup>c</sup> | nd <sup>c</sup>               | nd <sup>c</sup> |
| 2     | 373                | nd <sup>c</sup>                                        | nd <sup>c</sup>               | nd <sup>c</sup> | nd <sup>c</sup>               | nd <sup>c</sup> |
| 3     | 423                | nd <sup>c</sup>                                        | nd <sup>c</sup>               | nd <sup>c</sup> | nd <sup>c</sup>               | nd <sup>c</sup> |
| 4     | 473                | nd <sup>c</sup>                                        | nd <sup>c</sup>               | nd <sup>c</sup> | nd <sup>c</sup>               | nd <sup>c</sup> |
| 5     | 523                | nd <sup>c</sup>                                        | 0.026                         | 0.22            | nd <sup>c</sup>               | 0.48            |
| 6     | 573 <sup>d</sup>   | nd <sup>c</sup>                                        | 0.025                         | 0.28            | trace <sup>e</sup>            | 1.1             |
| 7     | 623 <sup>d</sup>   | nd <sup>c</sup>                                        | 0.23                          | 0.27            | trace <sup>e</sup>            | 1.9             |
| 8     | 673 <sup>d</sup>   | nd <sup>c</sup>                                        | 3.3                           | 0.38            | trace <sup>e</sup>            | 7.1             |
| 9     | 723 <sup>d</sup>   | nd <sup>c</sup>                                        | 23.5                          | 0.82            | trace <sup>e</sup>            | 31.2            |

<sup>a</sup>Other reaction conditions were same as those described in the footnote *a* of Table 1 in the main text. <sup>b</sup>Production rates were measured after 1.5 h at each temperature. <sup>c</sup>nd = not detected. <sup>d</sup>Small amount of CO was also observed. <sup>e</sup>The amount of the product was less than 0.01  $\mu\text{mol h}^{-1}$ .

**Table S3** Effect of increasing the temperature in dark with the Au(0.4)/Ga<sub>2</sub>O<sub>3</sub> sample<sup>a</sup>

| Entry | Temperature (K)  | Production rates <sup>b</sup> / $\mu\text{mol h}^{-1}$ |                               |                 |                               |                 |
|-------|------------------|--------------------------------------------------------|-------------------------------|-----------------|-------------------------------|-----------------|
|       |                  | C <sub>4</sub> H <sub>10</sub>                         | C <sub>2</sub> H <sub>4</sub> | CH <sub>4</sub> | C <sub>3</sub> H <sub>6</sub> | H <sub>2</sub>  |
| 1     | 323              | nd <sup>c</sup>                                        | nd <sup>c</sup>               | nd <sup>c</sup> | nd <sup>c</sup>               | nd <sup>c</sup> |
| 2     | 373              | nd <sup>c</sup>                                        | nd <sup>c</sup>               | nd <sup>c</sup> | nd <sup>c</sup>               | nd <sup>c</sup> |
| 3     | 423              | nd <sup>c</sup>                                        | nd <sup>c</sup>               | nd <sup>c</sup> | nd <sup>c</sup>               | nd <sup>c</sup> |
| 4     | 473              | nd <sup>c</sup>                                        | nd <sup>c</sup>               | nd <sup>c</sup> | nd <sup>c</sup>               | nd <sup>c</sup> |
| 5     | 523              | nd <sup>c</sup>                                        | trace <sup>d</sup>            | 0.07            | nd <sup>c</sup>               | 0.17            |
| 6     | 623 <sup>e</sup> | nd <sup>c</sup>                                        | 8.4                           | 0.10            | trace <sup>d</sup>            | 10.2            |
| 7     | 673 <sup>e</sup> | nd <sup>c</sup>                                        | 126.2                         | 0.11            | trace <sup>d</sup>            | 128.8           |

<sup>a</sup>Other reaction conditions were same as those described in the footnote *a* of Table 1 in the main text. <sup>b</sup>Production rates were measured after 1.5 h at each temperature. <sup>c</sup>nd = not detected. <sup>d</sup>The amount of the product was less than 0.01  $\mu\text{mol h}^{-1}$ . <sup>e</sup>Small amount of CO was also observed.

## References

- 1 S. P. Singh, A. Anzai, S. Kawaharasaki, A. Yamamoto and H. Yoshida, *Catal. Today*, 2021, **375**, 264–272.
- 2 S. P. Singh, A. Yamamoto, E. Fudo, A. Tanaka, H. Kominami and H. Yoshida, *ACS Catal.*, 2021, **11**, 13768–13781.
- 3 S. Rolt, P. Clark, J. Schmoll and B. J. R. Shaw, *Sp. Telesc. Instrum. 2016 Opt. Infrared, Millim. Wave*, 2016, **9904**, 99044V.
- 4 Y. Lu, Z. Shen and Y. Zhou, *J. Opt. Technol.*, 2013, **80**, 474.
- 5 M. Ishimaru, F. Amano, C. Akamoto and S. Yamazoe, *J. Catal.*, 2021, **397**, 192–200.
